# Supplementary material for: Fluorinated Alq3 derivatives with tunable optical properties
Source: Royal Society of Chemistry journal article supplement (doi:10.1039/b516757d), 2006-01-01
Supplement: b516757d.pdf [file b516757d.pdf]

## Supporting Information for Manuscript B516757D

### 1. UV-Vis absorption spectra

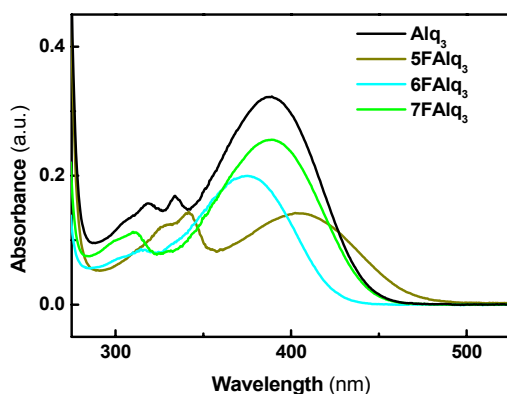

Figure S1 UV-Vis spectra of Alq<sub>3</sub>, 5FAlq<sub>3</sub>, 6FAlq<sub>3</sub> and 7FAlq<sub>3</sub> in CHCl<sub>3</sub> solutions ( $\sim 1 \times 10^{-5}$  M).

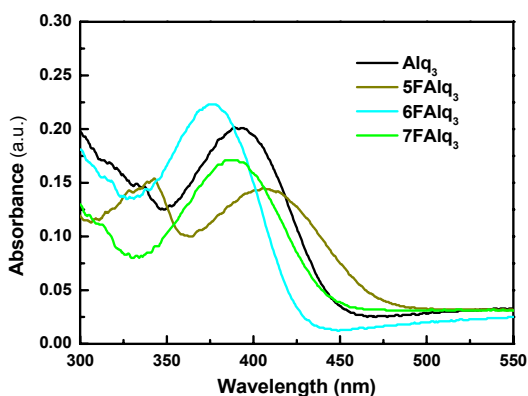

Figure S2 UV-Vis spectra of Alq<sub>3</sub>, 5FAlq<sub>3</sub>, 6FAlq<sub>3</sub> and 7FAlq<sub>3</sub> thin films vacuum-deposited on the quartz substrates ( $\sim 50$  nm thick).

### 2. Geometric isomers

<sup>1</sup>H NMR spectra of Alq<sub>3</sub> and its fluorinated derivatives solutions in CDCl<sub>3</sub> were obtained on a Bruker AVANCE DMX500 nuclear resonance spectroscope (500 MHz) under ambient conditions. From these spectra (Figures S4-S7), it is concluded that Alq<sub>3</sub> and its fluorinated derivatives obtained in this work (purified twice by temperature gradient sublimation) are all meridional isomers, in which three hydroquinoline ligands are inequivalent by geometric symmetry, i.e. each ligand is distinguishable, leading to the splitting of the NMR peak of each hydrogen atom, especially those H atoms located on the pyridyl ring (H2, H3 and H4, see Figure S3).

Detailed assignments of NMR peaks of *mer*-Alq<sub>3</sub> can be found in the work reported by M. Utz et al. (*J. Am. Chem. Soc.*, 2003, V125, p1371). Our results are in perfect consistence with theirs.

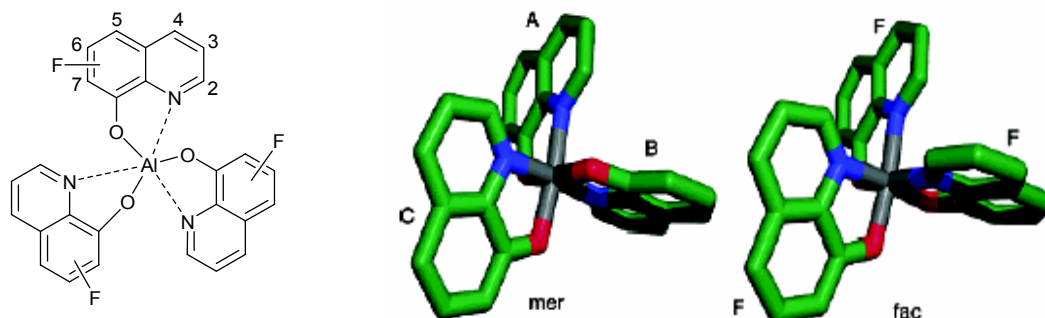

Figure S3 Molecular structures of Alq<sub>3</sub> and its fluorinated derivatives (left), and 3D schematics of the meridional and facial isomers (right).

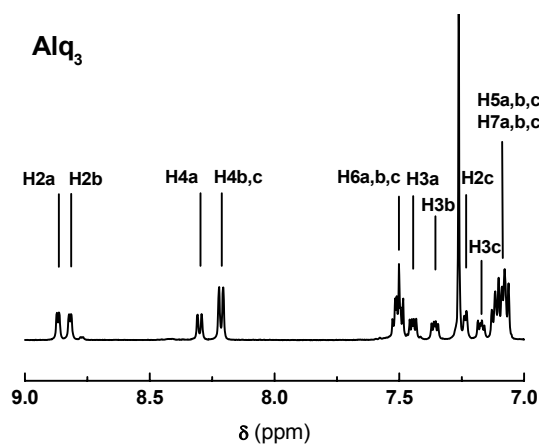

Figure S4 <sup>1</sup>H NMR spectrum of Alq<sub>3</sub> solution in CDCl<sub>3</sub>.

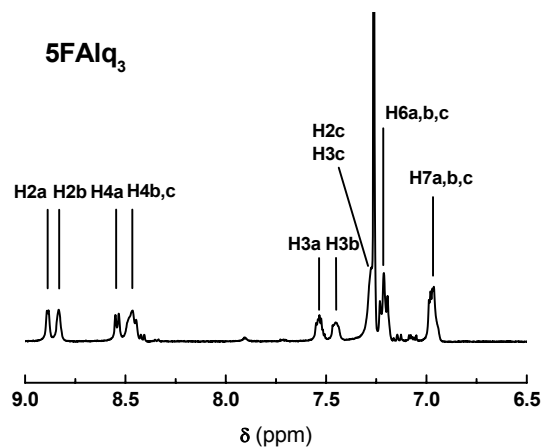

Figure S5 <sup>1</sup>H NMR spectrum of 5FAlq<sub>3</sub> solution in CDCl<sub>3</sub>.

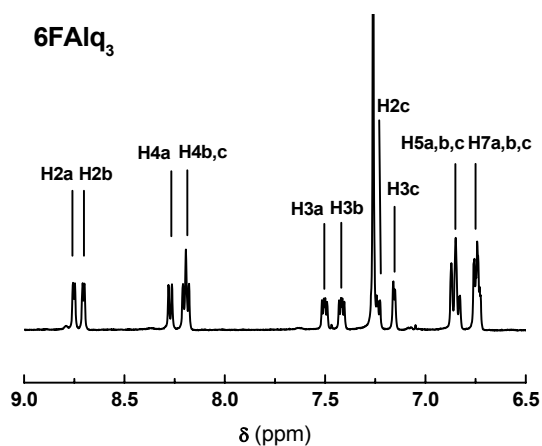

Figure S6 <sup>1</sup>H NMR spectrum of 6FAlq<sub>3</sub> solution in CDCl<sub>3</sub>.

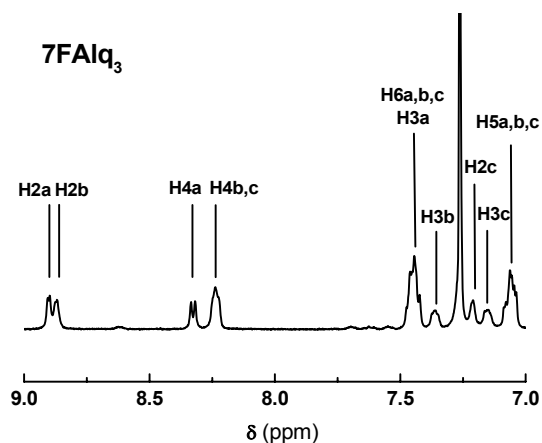

Figure S7 <sup>1</sup>H NMR spectrum of 7FAlq<sub>3</sub> solution in CDCl<sub>3</sub>.

It had been demonstrated that *mer*-Alq<sub>3</sub> can be transformed to *fac*-Alq<sub>3</sub> by annealing, resulting in an exothermic phase transition at ~ 380 °C in the DSC curve (*Adv. Funct. Mater.*, 2003, V13, p108). In our experiments, we also observed this phenomenon. However, the phase transition peaks of fluorinated Alq<sub>3</sub> derivatives could not be found. Furthermore, the vacuum-deposited films of Alq<sub>3</sub> and its fluorinated derivatives are all amorphous (because there are no diffraction peaks in XRD patterns). Therefore, in our case, the effect of fluorination position on the optical properties of Alq<sub>3</sub> originates from different molecular electronic structures instead of stereo isomerization or crystal polymorphs.

### 3. Fluorescence efficiencies in thin films

Alq<sub>3</sub> and its fluorinated derivatives were vacuum evaporated at a pressure below  $1 \times 10^{-5}$  Torr onto glass substrates (30 mm  $\times$  30 mm), and the deposition rate was 1-2 Å/s. All obtained thin films were 50 nm thick, monitored with a quartz crystal oscillator. Their fluorescence spectra were recorded at an excitation wavelength of 370 nm on a Hitachi 4500 fluorescence spectrophotometer. With Alq<sub>3</sub> as a reference, the fluorescence efficiencies of fluorinated Alq<sub>3</sub> derivatives in the solid state were roughly estimated by comparing their fluorescence intensity after the calibration of their absorbances at 370 nm.

### 4. HOMO-LUMO levels

Cyclic voltammetry (CV) measurements were carried out on a CHI600A electrochemical workstation, using millimolar solutions in CH<sub>2</sub>Cl<sub>2</sub> containing 0.1M supporting electrolyte of tetrabutylammonium perchlorate in a three-electrode-cell, where Pt plate served as the working electrode, Pt wire as the counter electrode, and saturated calomel electrode (SCE) was used as the reference electrode. The scanning rate was 50 mV/s. From one-electron quasi-reversible reduction and oxidation peaks in CV curves (Figures S8-S12), the LUMO energy levels of Alq<sub>3</sub>, 5FAlq<sub>3</sub>, 6FAlq<sub>3</sub>, and 7FAlq<sub>3</sub> were calculated as -2.82, -3.06, -3.25, and -3.00 eV, respectively. It was worthy noting that the reduction and oxidation peaks of Alq<sub>3</sub> were not well resolved under normal scanning rate (*J. Am. Chem. Soc.*, 1998, V120, p9646), however, they became obvious in the 1st derivative of the CV curve (*Chem. J. Chinese Universities*, 2000, V21, p1422). From their absorption onsets in solutions (Figure S1), the LUMO-HOMO band gaps of Alq<sub>3</sub>, 5FAlq<sub>3</sub>, 6FAlq<sub>3</sub> and 7FAlq<sub>3</sub> were estimated as 2.81, 2.66, 2.93 and 2.81 eV, respectively. Thus the HOMO energy levels of Alq<sub>3</sub>, 5FAlq<sub>3</sub>, 6FAlq<sub>3</sub>, and 7FAlq<sub>3</sub> were calculated to be -5.63, -5.72, -6.18, and -5.81 eV, respectively.

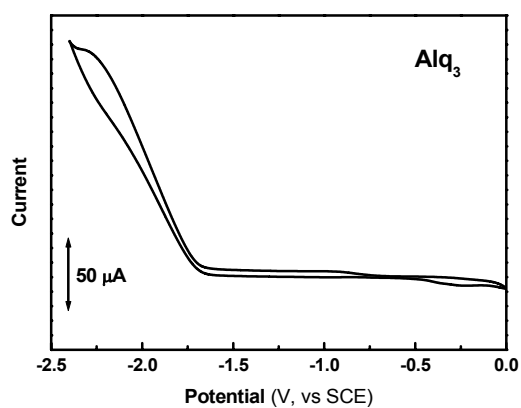

Figure S8 Cyclic voltammogram of Alq<sub>3</sub> solution in CH<sub>2</sub>Cl<sub>2</sub>.

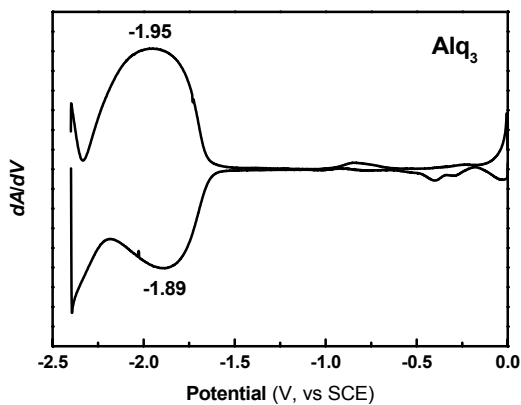

Figure S9 The 1st differential curve of cyclic voltammogram of Alq<sub>3</sub> solution in CH<sub>2</sub>Cl<sub>2</sub>.

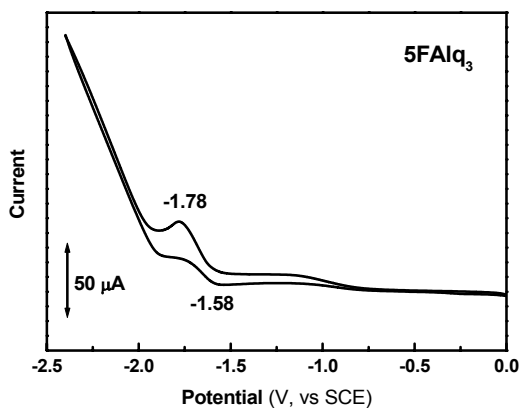

Figure S10 Cyclic voltammogram of 5FAlq<sub>3</sub> solution in CH<sub>2</sub>Cl<sub>2</sub>.

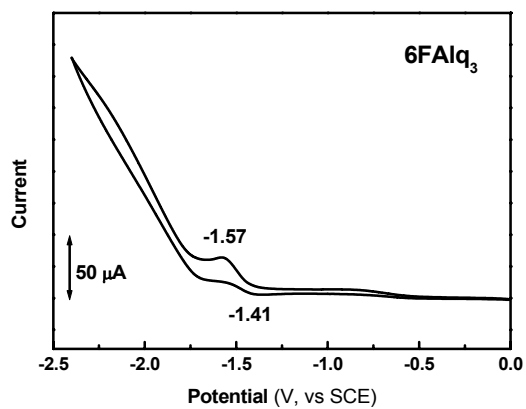

Figure S11 Cyclic voltammogram of 6FAIq<sub>3</sub> solution in CH<sub>2</sub>Cl<sub>2</sub>.

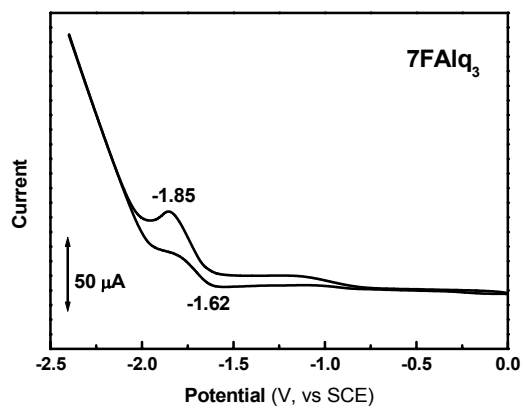

Figure S12 Cyclic voltammogram of 7FAIq<sub>3</sub> solution in CH<sub>2</sub>Cl<sub>2</sub>.
